# Supplementary material
Source: MDPI journal article supplement (https://www.mdpi.com/2073-4395/13/9/2210)
Supplement: s1 [file s1]

**Table S1.** Characterization of the mitogenome of selected genotypes of *C. picta* (457-1, S7) and *C. melanoneura* (498-2, AO282)

| Region      |     | <i>C. picta</i> (457-1, S7) |        |             | <i>C. melanoneura</i> (498-2) |        | <i>C. melanoneura</i> (AO282) |        |             |
|-------------|-----|-----------------------------|--------|-------------|-------------------------------|--------|-------------------------------|--------|-------------|
|             |     | Start                       | End    | Length [bp] | Start                         | End    | Start                         | End    | Length [bp] |
| trnI(gat)   | Fw  | 1                           | 66     | 66          | 1                             | 66     | 1                             | 66     | 66          |
| trnQ(ttg)   | Rev | 71                          | 136    | 66          | 71                            | 136    | 71                            | 136    | 66          |
| trnM(cat)   | Fw  | 142                         | 205    | 64          | 142                           | 207    | 142                           | 207    | 66          |
| ND2         | Fw  | 206                         | 1,177  | 972         | 208                           | 1,179  | 208                           | 1,179  | 972         |
| trnW(tca)   | Fw  | 1,176                       | 1,237  | 62          | 1,178                         | 1,240  | 1,178                         | 1,240  | 63          |
| trnC(gca)   | Rev | 1,240                       | 1,302  | 63          | 1,243                         | 1,305  | 1,243                         | 1,305  | 63          |
| trnY(gta)   | Rev | 1,303                       | 1,365  | 63          | 1,306                         | 1,367  | 1,306                         | 1,367  | 62          |
| COI         | Fw  | 1,367                       | 2,896  | 1,53        | 1,369                         | 2,901  | 1,369                         | 2,901  | 1,533       |
| trnL2(taa)  | Fw  | 2,896                       | 2,959  | 64          | 2,901                         | 2,965  | 2,901                         | 2,965  | 65          |
| COII        | Fw  | 2,960                       | 3,623  | 664         | 2,966                         | 3,629  | 2,966                         | 3,629  | 664         |
| trnK(ctt)   | Fw  | 3,624                       | 3,693  | 70          | 3,630                         | 3,699  | 3,630                         | 3,699  | 70          |
| trnD(gtc)   | Fw  | 3,692                       | 3,753  | 62          | 3,701                         | 3,761  | 3,701                         | 3,761  | 61          |
| ATP8        | Fw  | 3,754                       | 3,903  | 150         | 3,762                         | 3,914  | 3,762                         | 3,914  | 153         |
| ATP6        | Fw  | 3,903                       | 4,574  | 672         | 3,911                         | 4,582  | 3,911                         | 4,582  | 672         |
| COIII       | Fw  | 4,574                       | 5,351  | 778         | 4,582                         | 5,359  | 4,582                         | 5,359  | 778         |
| trnG(tcc)   | Fw  | 5,352                       | 5,409  | 58          | 5,360                         | 5,419  | 5,360                         | 5,419  | 60          |
| ND3         | Fw  | 5,410                       | 5,760  | 351         | 5,420                         | 5,77   | 5,420                         | 5,770  | 351         |
| trnA(tgc)   | Fw  | 5,762                       | 5,822  | 61          | 5,770                         | 5,829  | 5,770                         | 5,829  | 60          |
| trnR(tcg)   | Fw  | 5,827                       | 5,887  | 61          | 5,840                         | 5,900  | 5,840                         | 5,900  | 61          |
| trnN(gtt)   | Fw  | 5,887                       | 5,952  | 66          | 5,900                         | 5,964  | 5,900                         | 5,964  | 65          |
| trnS1(gct)  | Fw  | 5,953                       | 6,006  | 54          | 5,965                         | 6,018  | 5,965                         | 6,018  | 54          |
| trnE(ttc)   | Fw  | 6,007                       | 6,067  | 61          | 6,019                         | 6,079  | 6,019                         | 6,078  | 60          |
| trnF(gaa)   | Rev | 6,056                       | 6,118  | 63          | 6,068                         | 6,13   | 6,067                         | 6,129  | 63          |
| ND5         | Rev | 6,119                       | 7,736  | 1,618       | 6,131                         | 7,748  | 6,13                          | 7,747  | 1,618       |
| trnH(gtg)   | Rev | 7,737                       | 7,797  | 61          | 7,749                         | 7,809  | 7,748                         | 7,808  | 61          |
| ND4         | Rev | 7,798                       | 9,046  | 1,249       | 7,81                          | 9,055  | 7,809                         | 9,054  | 1,246       |
| ND4l        | Rev | 9,040                       | 9,327  | 288         | 9,049                         | 9,336  | 9,048                         | 9,335  | 288         |
| trnT(tgt)   | Fw  | 9,329                       | 9,389  | 61          | 9,338                         | 9,397  | 9,337                         | 9,396  | 60          |
| trnP(tgg)   | Rev | 9,390                       | 9,452  | 63          | 9,398                         | 9,463  | 9,397                         | 9,462  | 66          |
| ND6         | Fw  | 9,455                       | 9,940  | 486         | 9,466                         | 9,951  | 9,465                         | 9,950  | 486         |
| CYTB        | Fw  | 9,940                       | 11,076 | 1,137       | 9,951                         | 11,087 | 9,950                         | 11,086 | 1,137       |
| trnS2(tga)  | Fw  | 11,078                      | 11,141 | 64          | 11,091                        | 11,153 | 11,09                         | 11,152 | 63          |
| GCCTA motif | Rev | 11,153                      | 11,157 | 5           | 11,165                        | 11,169 | 11,164                        | 11,168 | 5           |
| ND1         | Rev | 11,169                      | 12,083 | 915         | 11,181                        | 12,095 | 11,18                         | 12,094 | 915         |
| trnL1(tag)  | Rev | 12,084                      | 12,147 | 64          | 12,096                        | 12,158 | 12,095                        | 12,157 | 63          |
| 16S rRNA    | Rev | 12,148                      | 13,304 | 1,157       | 12,159                        | 13,31  | 12,158                        | 13,309 | 1,152       |
| trnV(tac)   | Rev | 13,305                      | 13,366 | 62          | 13,311                        | 13,373 | 13,310                        | 13,372 | 63          |
| 12S rRNA    | Rev | 13,367                      | 14,113 | 747         | 13,375                        | 14,122 | 13,374                        | 14,121 | 748         |
| A+T rich    | --  | 14,114                      | 14,802 | 689         | 14,123                        | 14,879 | 14,122                        | 14,879 | 758, 757    |
| polyT motif | --  | 14,532                      | 14,551 | 20          | 14,606                        | 14,628 | 14,607                        | 14,629 | 23          |

Abbreviations used as follows: ND2 - NADH dehydrogenase subunit 2 , COI - cytochrome c oxidase subunit I, COII - cytochrome c oxidase subunit II, ATP8 - ATP synthase membrane subunit 8, ATP6 - ATP synthase membrane subunit 6, COIII - cytochrome c oxidase subunit III, ND3 - NADH dehydrogenase subunit 3, ND5 - NADH dehydrogenase subunit 5, ND4 - NADH dehydrogenase subunit 4, ND4L - NADH dehydrogenase subunit 4L, ND6 - NADH dehydrogenase subunit 6, ND1 - NADH dehydrogenase subunit 1, CYTB – cytochrom b, A+T rich – A+T rich control region, trn – tRNA (amino acids marked by IUPAC code); Fw – forward orientation, Rev- reverse orientation.
