# Supplementary material
Source: MDPI journal article supplement (https://www.mdpi.com/2073-4395/13/9/2210)

**Figure S1:** Characterisation of codon usage by *C. picta* and *C. melanoneura*.

The frequencies calculated for each amino acid. The encoded amino acids marked by IUPAC code.

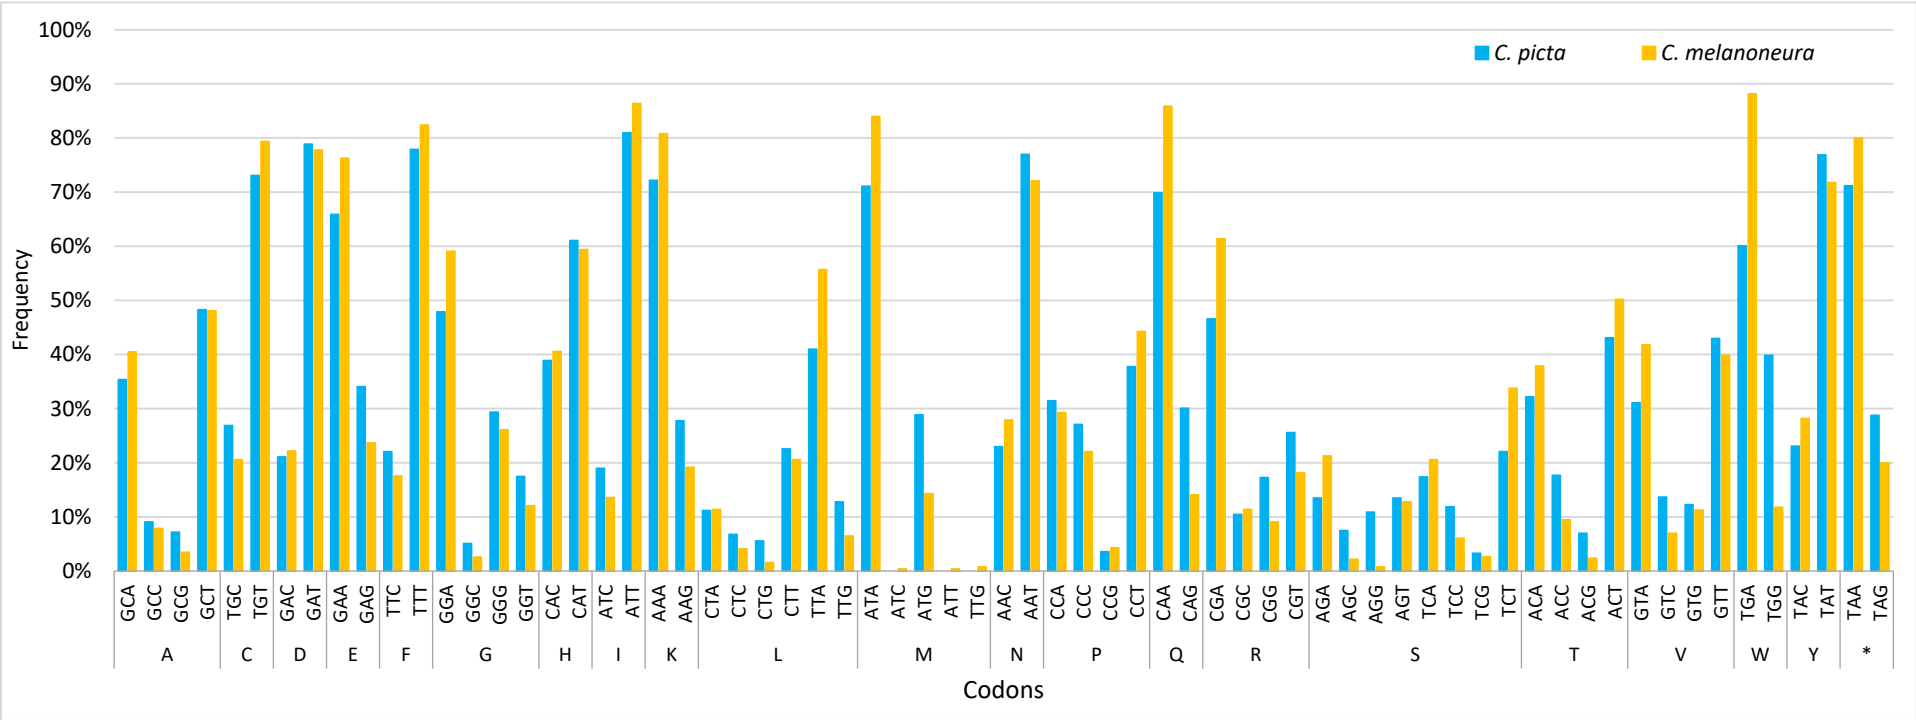

Supplement: s1 [file s1]
